# Supplementary material for: Accumulation of Circulating CCR7+ Natural Killer Cells Marks Melanoma Evolution and Reveals a CCL19-Dependent Metastatic Pathway
Source: Oxford University Press journal article supplement (doi:10.1158/2326-6066.cir-18-0651), 2019-04-02
Supplement: 23266066cir180651-sup-208946_2_supp_5326440_pmhyx9.pdf [file 23266066cir180651-sup-208946_2_supp_5326440_pmhyx9.pdf]

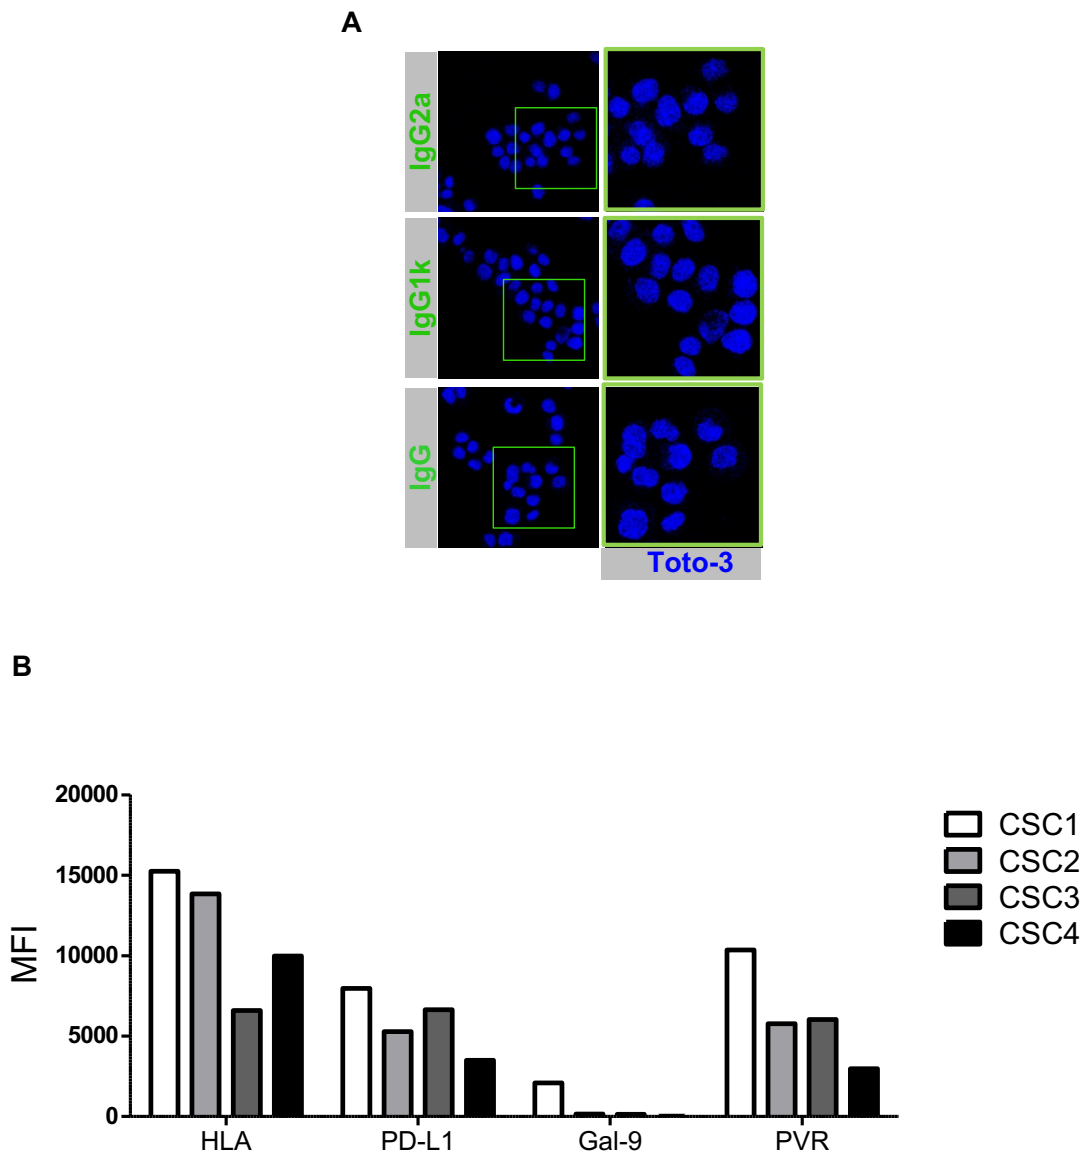

**Supplementary Figure 2. CSCs characterization.** (A) Negative controls for CD44, CD271, ABCB5, and CD166 antibodies on melanoma CSCs. Representative immunofluorescence analysis of IgG2a mouse monoclonal, IgG1k mouse monoclonal and goat IgG isotype controls on melanoma CSCs. Nuclei are stained with Toto-3 (blue). (B) Expression of NK cells immunomodulatory ligands on four melanoma CSC cell lines.
